# Supplementary material for: Rational design of polyaniline/MnO2/carbon cloth ternary hybrids as electrodes for supercapacitors
Source: Royal Society of Chemistry journal article supplement (doi:10.1039/c5ra10916g), 2015-01-01
Supplement: c5ra10916g1.pdf [file c5ra10916g1.pdf]

## Supporting Information

### Rational Design of Polyaniline/MnO<sub>2</sub>/Carbon Cloth Ternary Hybrids as Electrodes for Supercapacitors

Xin Zhao<sup>1</sup>, Chaoyi Chen<sup>1</sup>, Zilong Huang<sup>1</sup>, Lei Jin<sup>1</sup>, Junxian Zhang<sup>1</sup>, Yingzhi Li<sup>1</sup>, Lili Zhang<sup>2\*</sup>, and Qinghua Zhang<sup>1\*</sup>

<sup>1</sup>College of Material Science & Engineering, State Key Laboratory for Modification of Chemical Fibers and Polymer Materials, Donghua University, Shanghai 201620, China

<sup>2</sup>Institute of Chemical and Engineering Sciences, A\*STAR, 1 Pesek Road, Jurong Island 627833, Singapore

\*Corresponding author. Email: [zhang\\_lili@ices.a-star.edu.sg](mailto:zhang_lili@ices.a-star.edu.sg), [qhzhang@dhu.edu.cn](mailto:qhzhang@dhu.edu.cn)

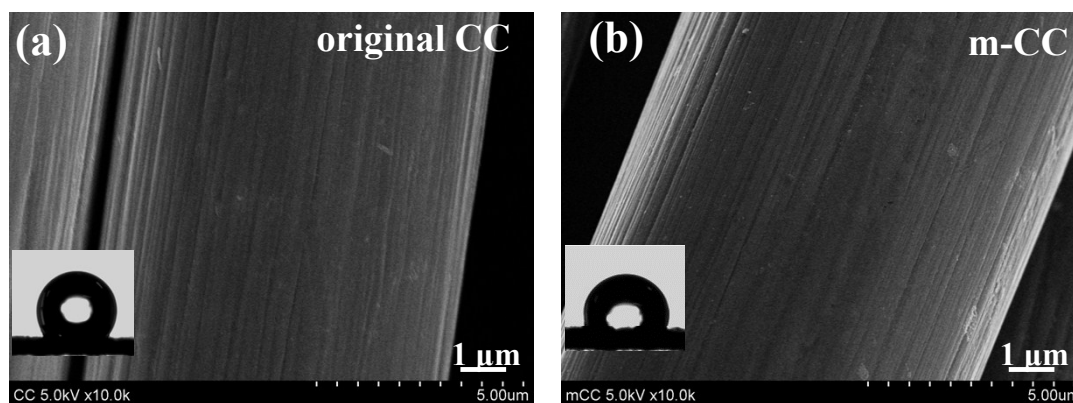

**Figure S1.** SEM images of original CC and m-CC and their hydrophilic tests (inset shows the contact angle).

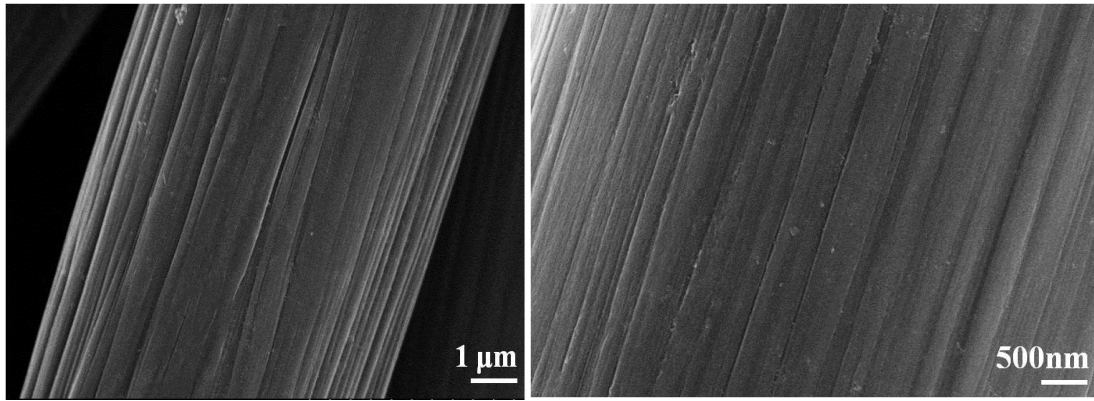

**Figure S2.** SEM images of m-CC after being etched in 1 M H<sub>2</sub>SO<sub>4</sub>.

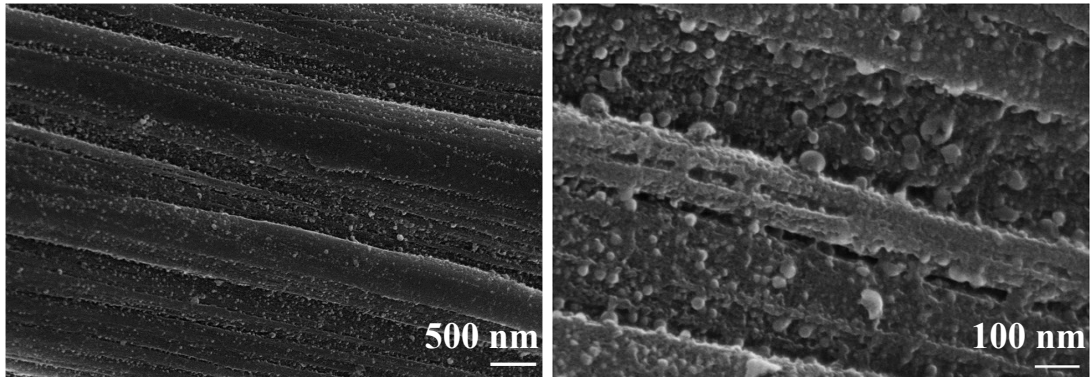

**Figure S3.** SEM images of  $\text{MnO}_2@m\text{-CC}$  after being etched by 1 M  $\text{H}_2\text{SO}_4$ .

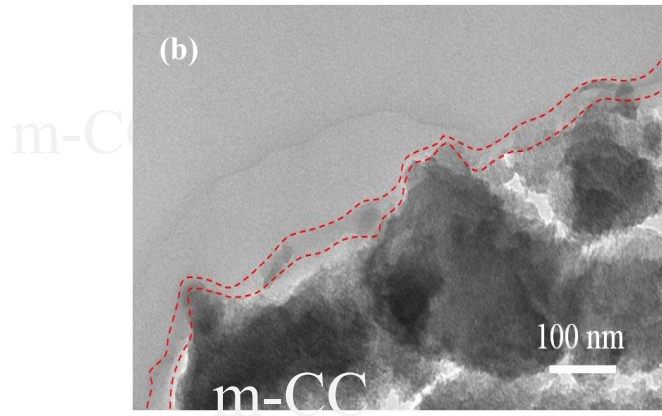

**Figure S4.** TEM images of (a) MnO<sub>2</sub>@PANI@m-CC and (b) PANI@MnO<sub>2</sub>@m-CC

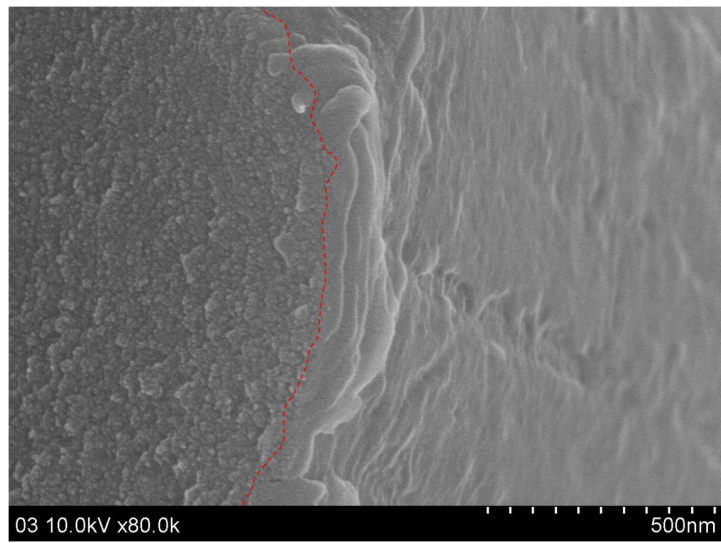

**Figure S5.** SEM image of the cross-section part of PANI@MnO<sub>2</sub>@m-CC

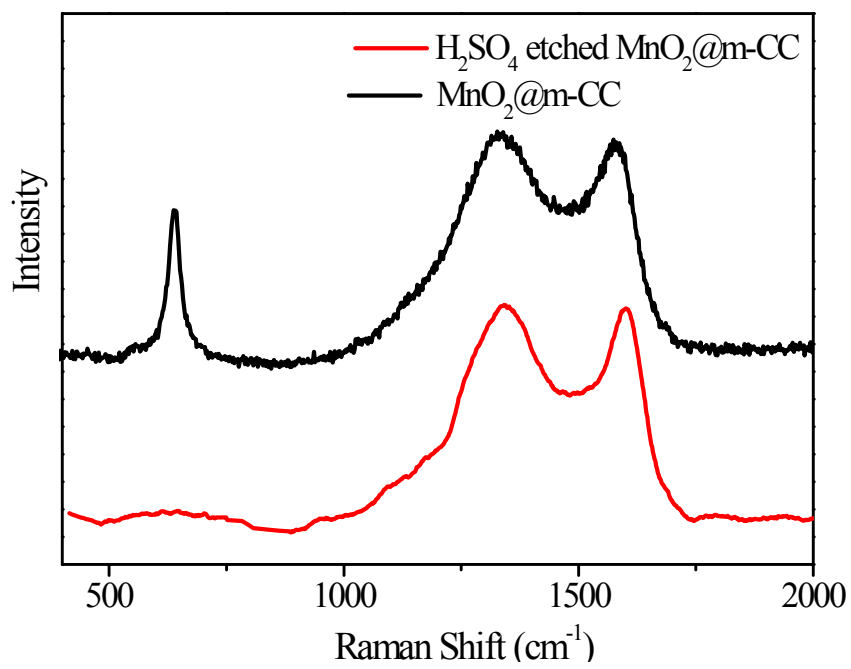

**Figure S6.** Raman spectra of H<sub>2</sub>SO<sub>4</sub> etched MnO<sub>2</sub>@m-CC and original MnO<sub>2</sub>@m-CC

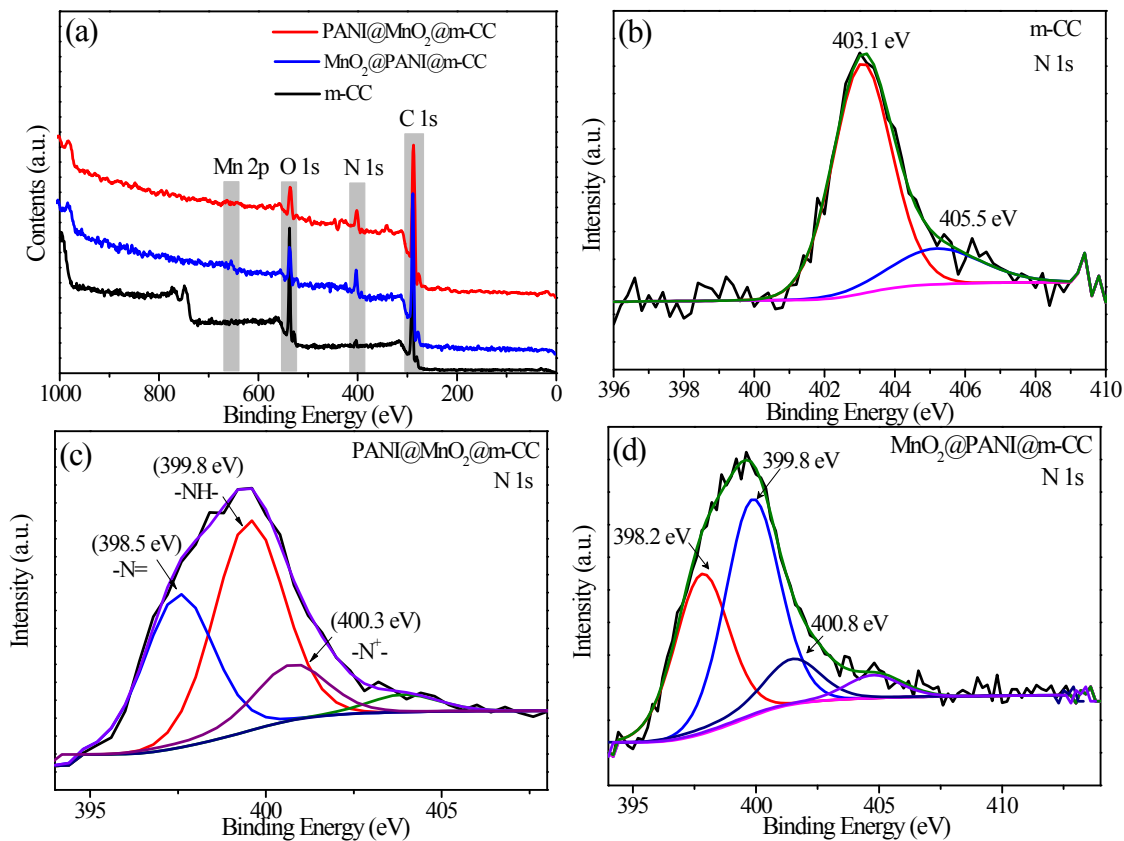

**Figure S7.** (a) Survey XPS spectrum of m-CC, PANI@m-CC, MnO<sub>2</sub>@PANI@m-CC and N 1s spectra of (b) m-CC, (c) PANI@m-CC and (d) MnO<sub>2</sub>@PANI@m-CC

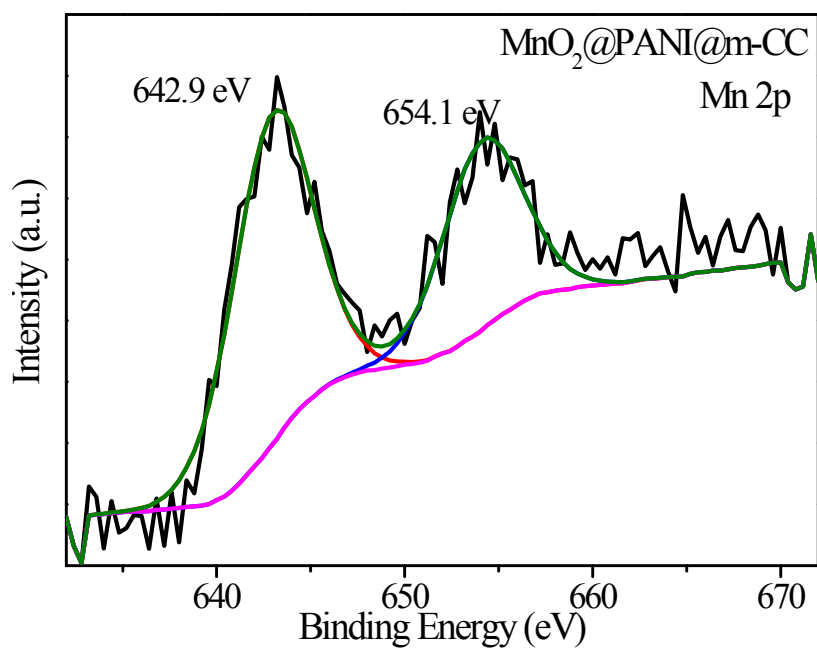

**Figure S8.** Mn 2p spectra for MnO<sub>2</sub>@PANI@m-CC



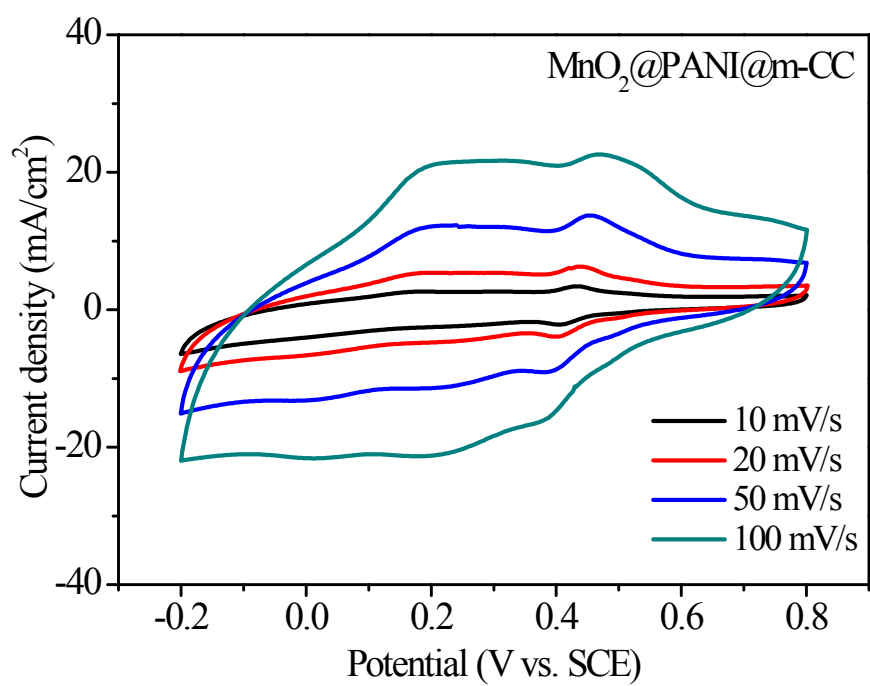

**Figure S9.** CV curves of MnO<sub>2</sub>@PANI@m-CC at various scan rates.

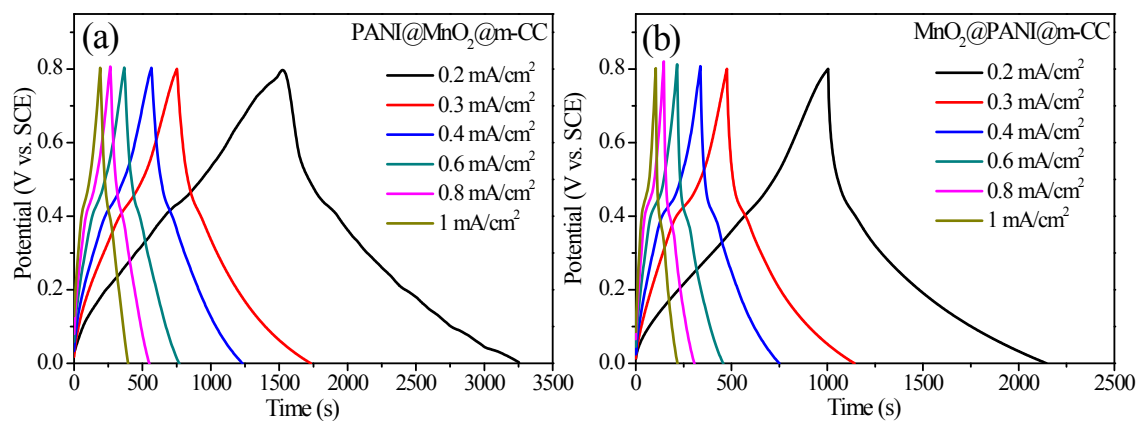

**Figure S10.** Galvanostatic charge/discharge curves of (a) PANI@MnO<sub>2</sub>@m-CC and (b) MnO<sub>2</sub>@PANI@m-CC at different current densities

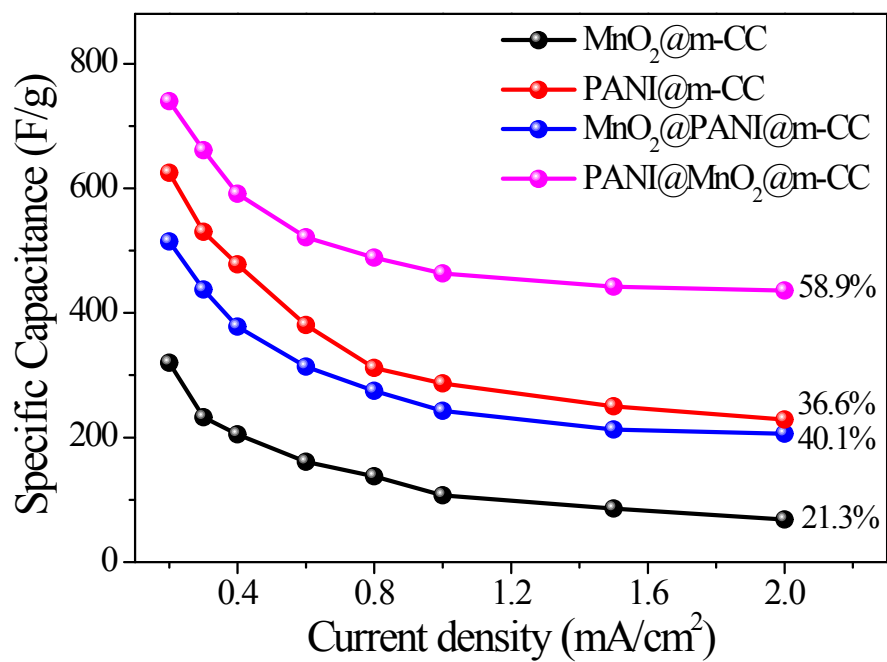

**Figure S11.** Gravimetric specific capacitance vs. current densities of as-prepared samples.

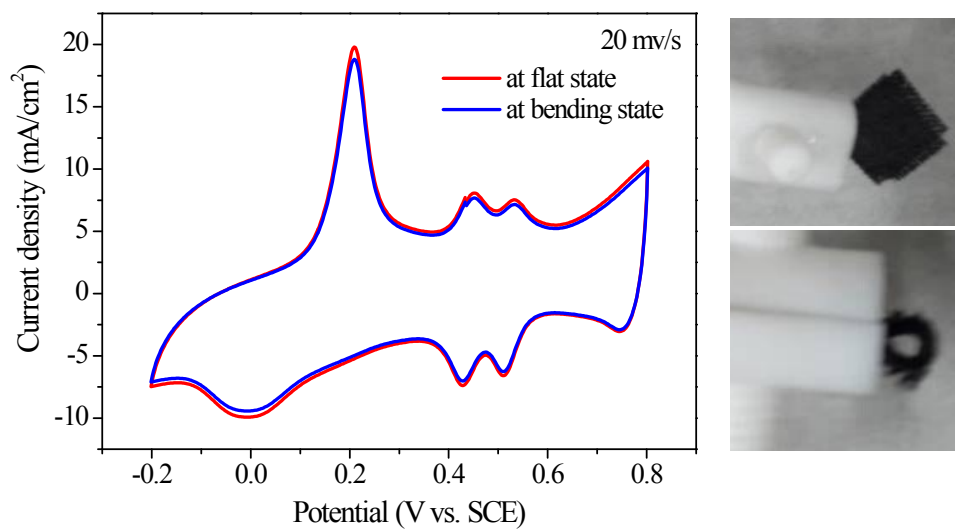

**Figure S12.** CV curves at 20 mV/s of PANI@MnO<sub>2</sub>@m-CC electrode at flat and bending state

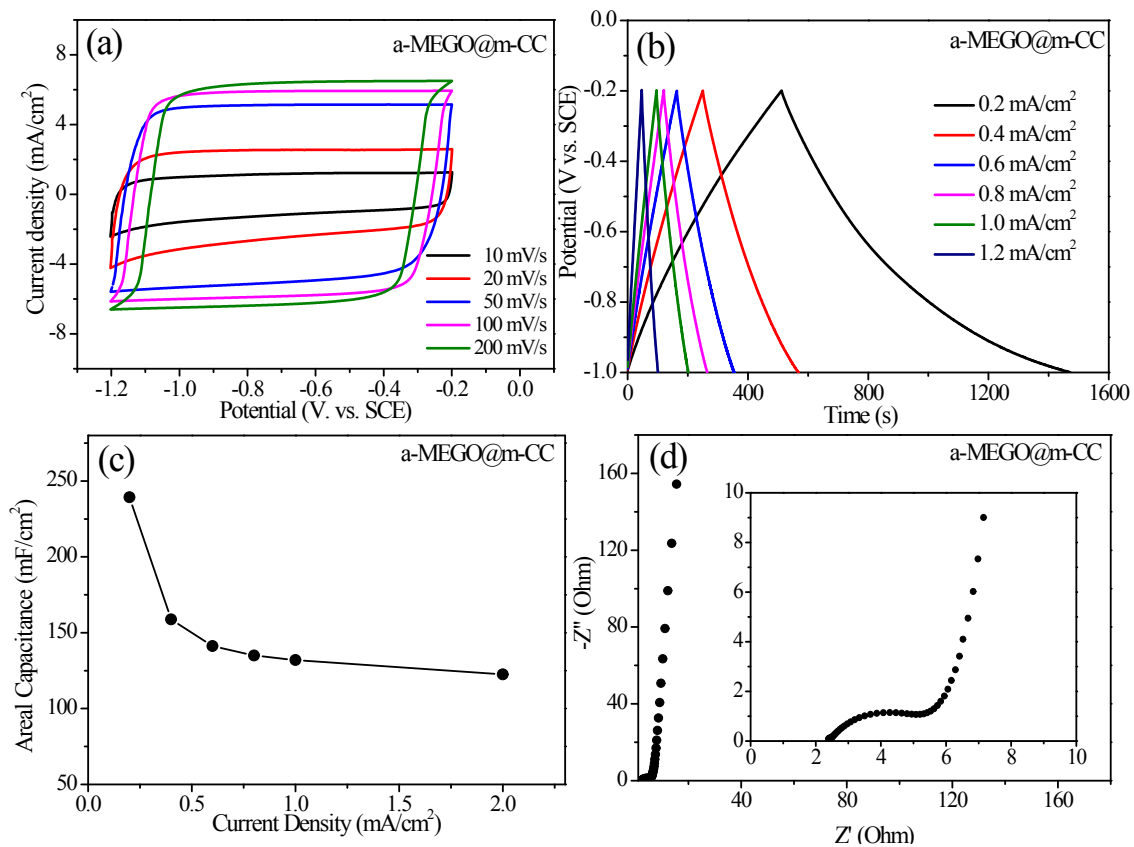

**Figure S13.** Three-electrode electrochemical measurements of a-MEGO@m-CC: (a) CV curves at various scan rates, (b) Galvanostatic charge/discharge curves at different current densities, (c) plot of areal capacitance vs. current density and (d) Nyquist plot from EIS measurement.

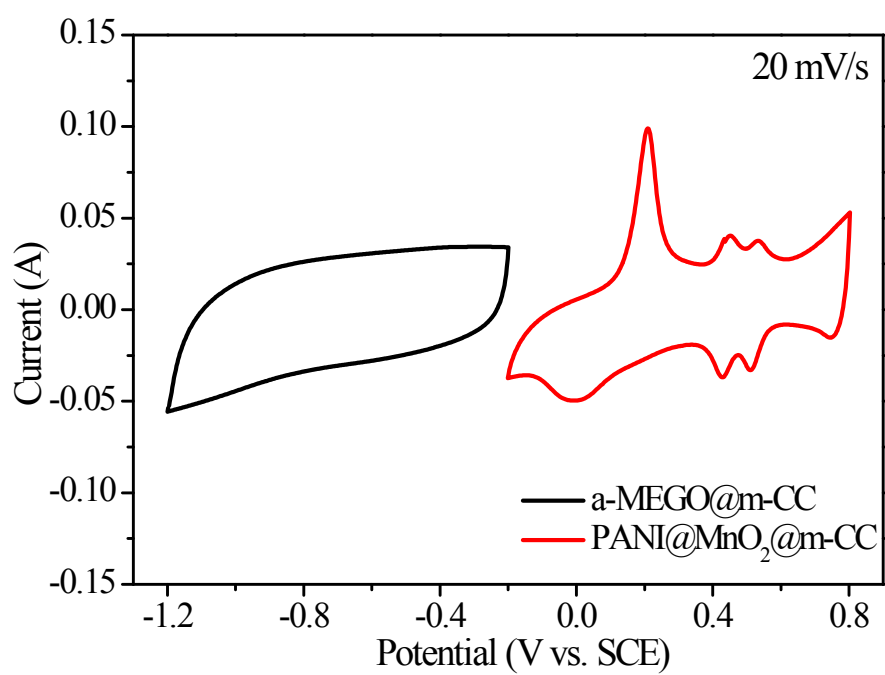

**Figure S14.** Comparison of the CV curves of a-MEGO@m-CC and PANI@MnO<sub>2</sub>@m-CC at different potential window in three electrode systems.

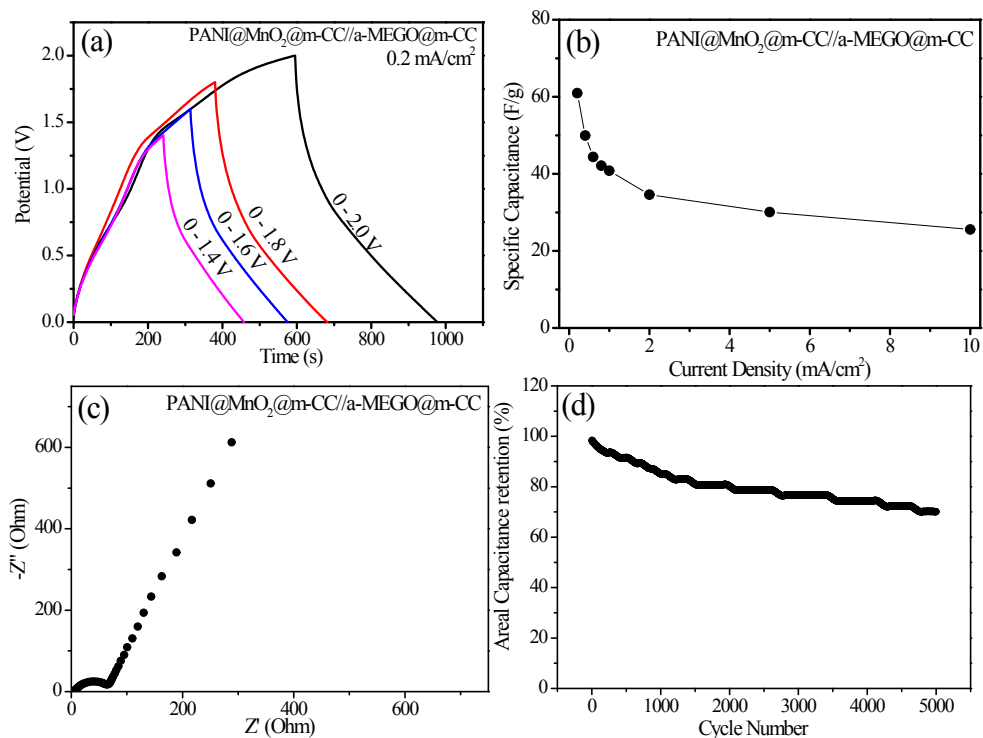

**Figure S15.** (a) Galvanostatic charge/discharge curves at a current density of 0.2 mA/cm<sup>2</sup> with different potential windows, (b) plots of gravimetric specific capacitance vs. current density, (c) Nyquist plots and (d) cycling stability curves of assembled PANI@MnO<sub>2</sub>@m-CC//a-MEGO@m-CC ASC device.

**Table S1.** The total mass of each samples obtained in our work.

| Samples (1×1 cm <sup>2</sup> ) | Mass (mg) |       |       |       |       |       |       |       |
|--------------------------------|-----------|-------|-------|-------|-------|-------|-------|-------|
| m-CC                           | 9.95      | 9.51  | 9.48  | 9.63  | 9.87  | 10.02 | 9.62  | 9.90  |
| MnO <sub>2</sub> @m-CC         | 10.15     | 9.73  | 9.70  | 9.84  | -     | -     | -     | -     |
| PANI@m-CC                      | -         | -     | -     | -     | 10.22 | 10.40 | 9.98  | 10.25 |
| PANI@MnO <sub>2</sub> @m-CC    | 10.50     | 10.11 | 10.05 | 10.21 | -     | -     | -     | -     |
| MnO <sub>2</sub> @PANI@m-CC    | -         | -     | -     | -     | 10.43 | 10.63 | 10.20 | 10.47 |



**Table S2.** Calculated areal and gravimetric specific capacitance of a-MEGO@m-CC and PANI@MnO<sub>2</sub>@m-CC at different current densities in a three electrode system.

| Samples                                                       | Capacitance                              | Current density (mA/cm <sup>2</sup> ) |       |       |       |       |       |
|---------------------------------------------------------------|------------------------------------------|---------------------------------------|-------|-------|-------|-------|-------|
|                                                               |                                          | 0.2                                   | 0.4   | 0.6   | 0.8   | 1.0   | 2.0   |
| a-MEGO@m-CC<br>(0.97 mg/cm <sup>2</sup> )                     | $C_{\text{areal}}$ (mF/cm <sup>2</sup> ) | 239.3                                 | 158.8 | 141.2 | 140   | 132   | 132.5 |
|                                                               | $C_{\text{m}}$ (F/g)                     | 246.6                                 | 163.7 | 145.6 | 144.4 | 136.1 | 136.6 |
| PANI@MnO <sub>2</sub> @m-<br>CC<br>(0.57 mg/cm <sup>2</sup> ) | $C_{\text{areal}}$ (mF/cm <sup>2</sup> ) | 421.6                                 | 337.1 | 297   | 278.6 | 264.1 | 251.3 |
|                                                               | $C_{\text{m}}$ (F/g)                     | 739.6                                 | 591.4 | 521.1 | 488.8 | 463.3 | 440.9 |
